# Supplementary material for: Guest-triggered “Soma–Iwamoto-type” penetration complex {Fe(4-methoxypyrimidine)2[M(CN)2]2}·Guest (M = Ag, Au)
Source: Royal Society of Chemistry journal article supplement (doi:10.1039/d2dt03716e), 2023-01-01
Supplement: d2dt03716e1.pdf [file d2dt03716e1.pdf]

## TG analysis

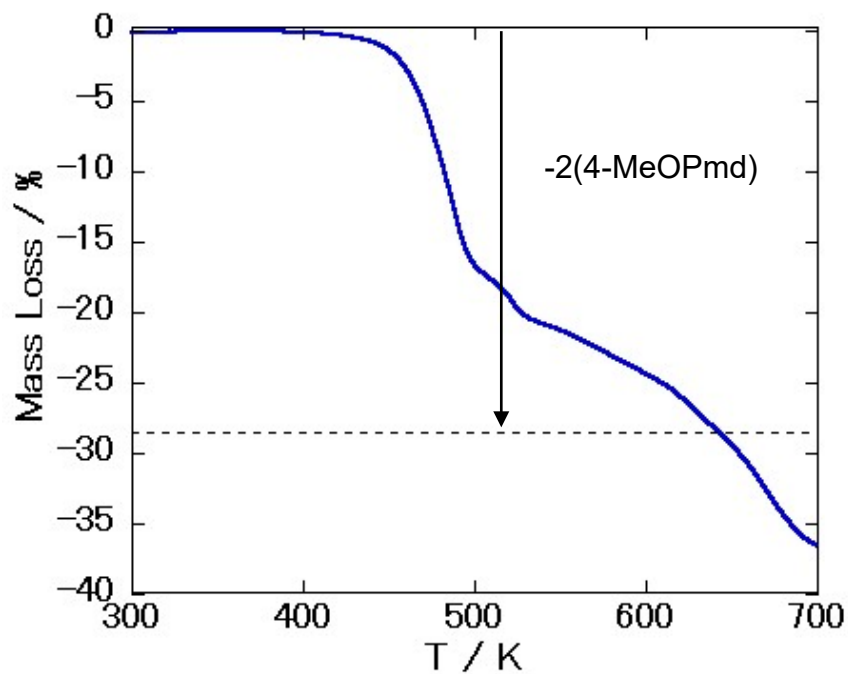

Fig. S1 TG analysis of 1Au

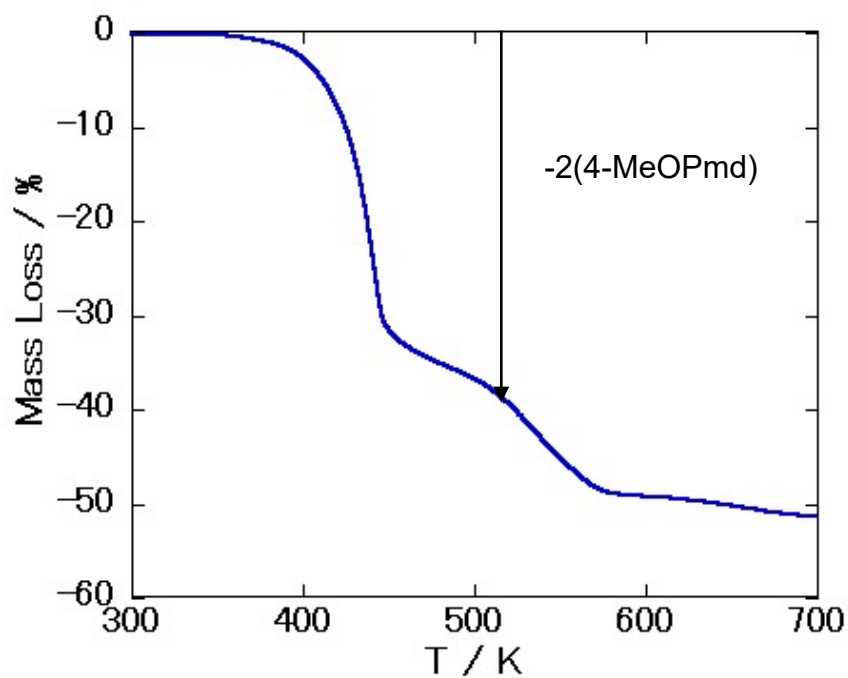

Fig. S2 TG analysis of 1Ag and 1Ag·0.25G

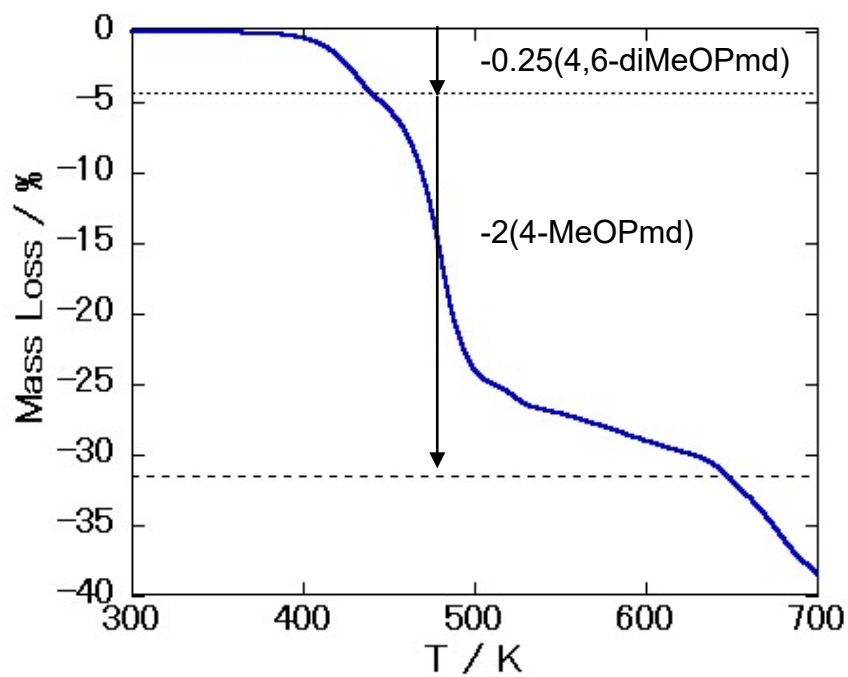

Fig. S3 TG analysis of 2Au·0.25G

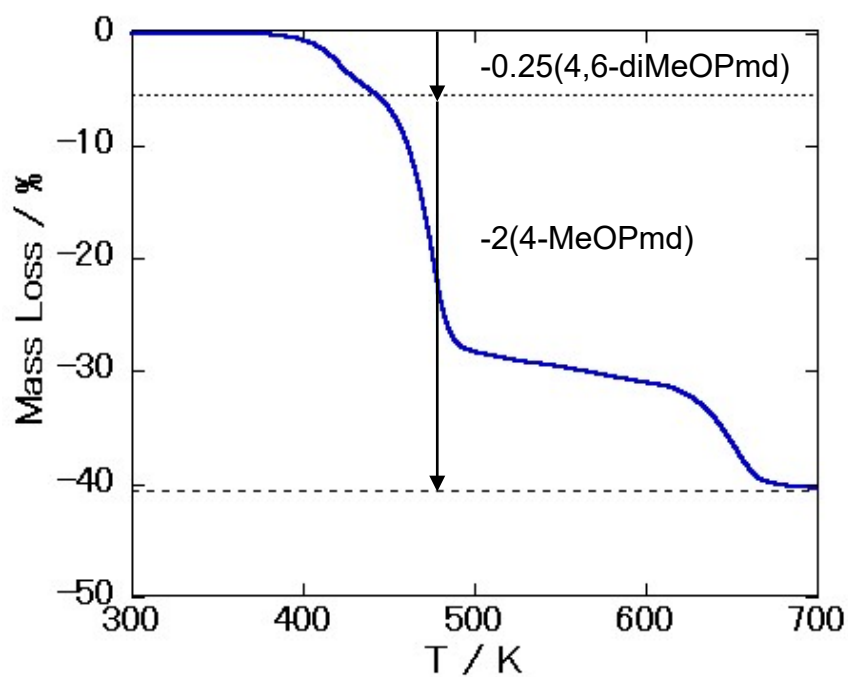

Fig. S4 TG analysis of 2Ag·0.25G

## IR spectra (Nujol method)

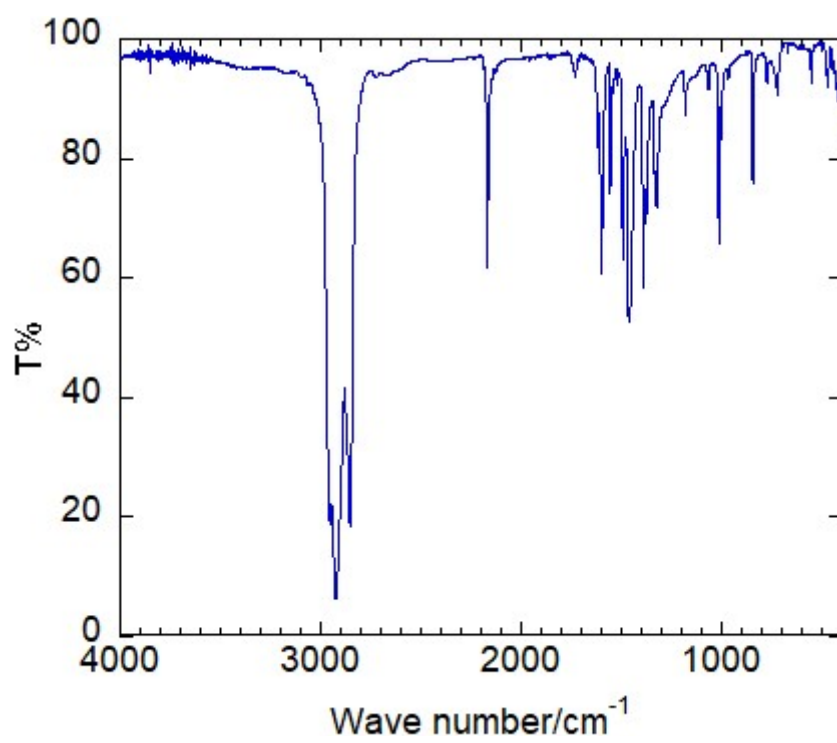

Fig. S5 IR spectrum of 1Au

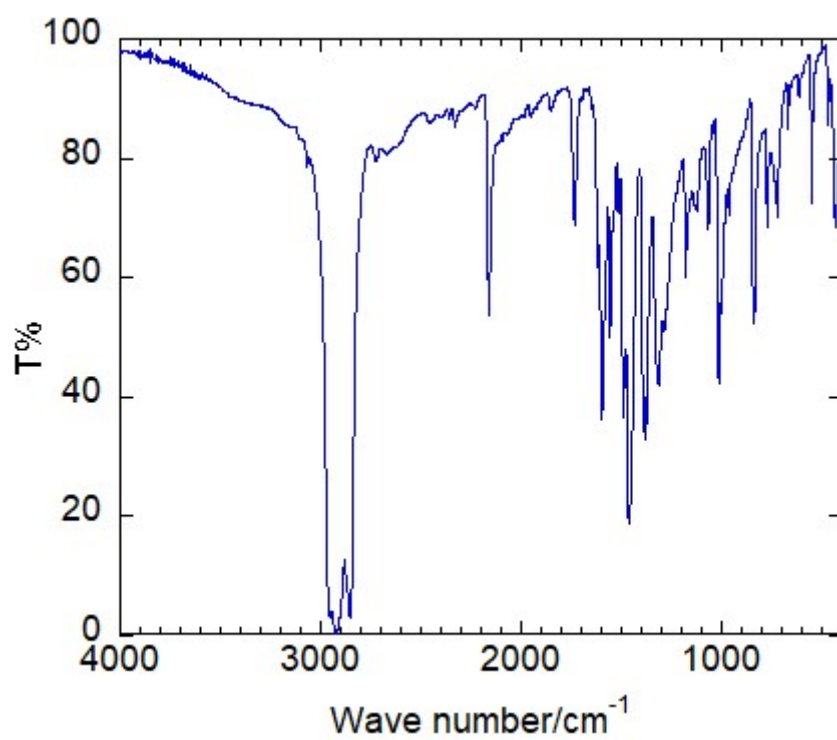

Fig. S6 IR spectrum of 1Ag and 1Ag·0.25G

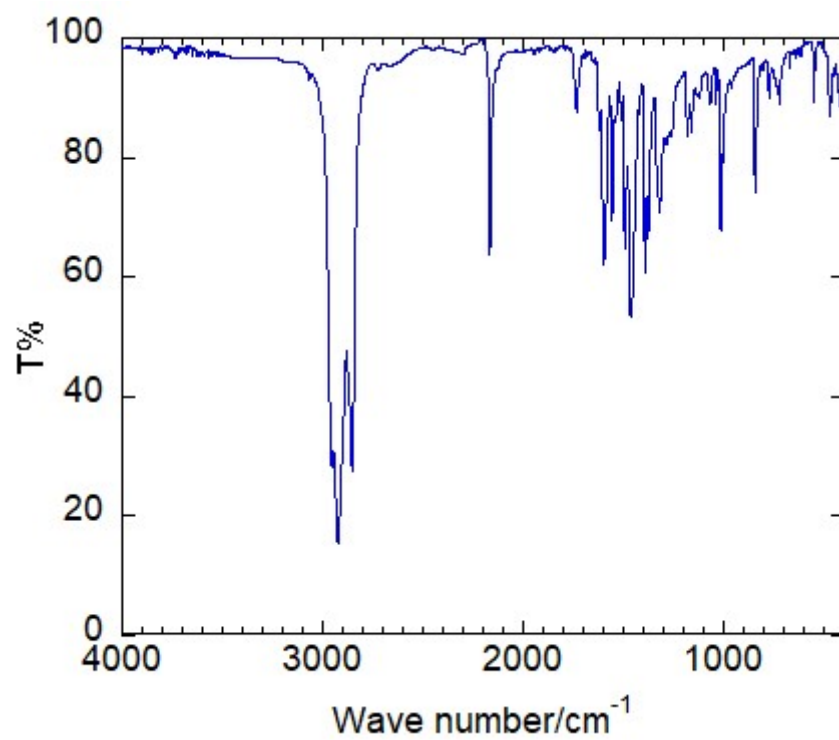

Fig. S7 IR spectrum of 2Au·0.25G

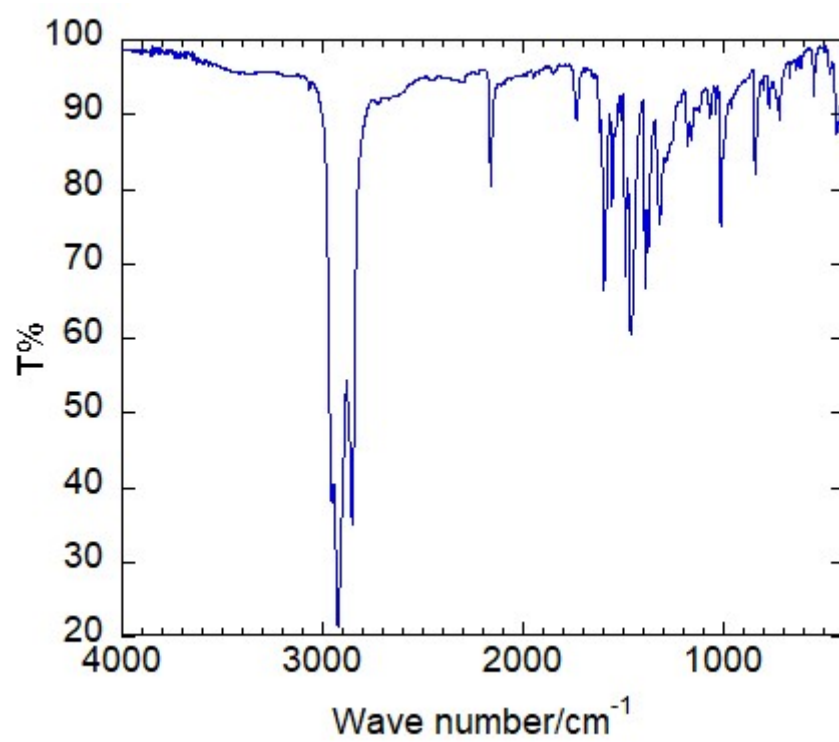

Fig. S8 IR spectrum of 2Ag·0.25G

## Powder X-ray Pattern

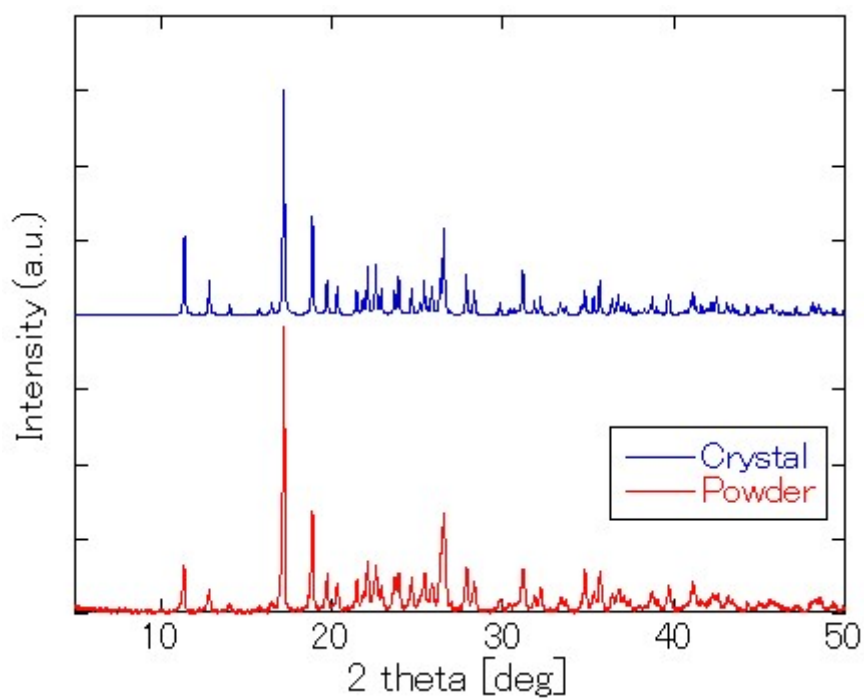

Fig. S9 Powder X-ray diffraction of 1Au

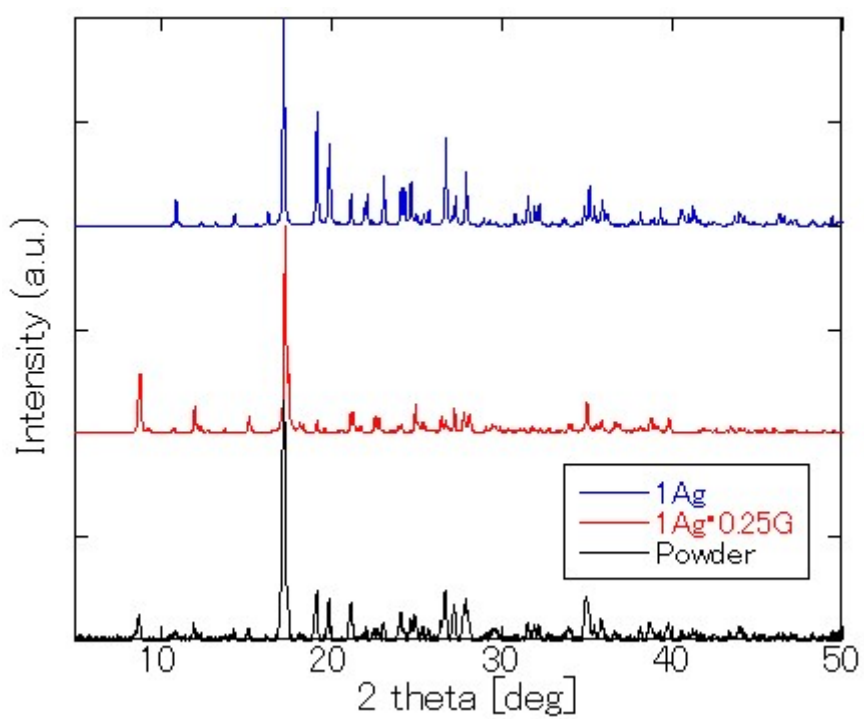

Fig. S10 Powder X-ray diffraction of 1Ag·0.25G

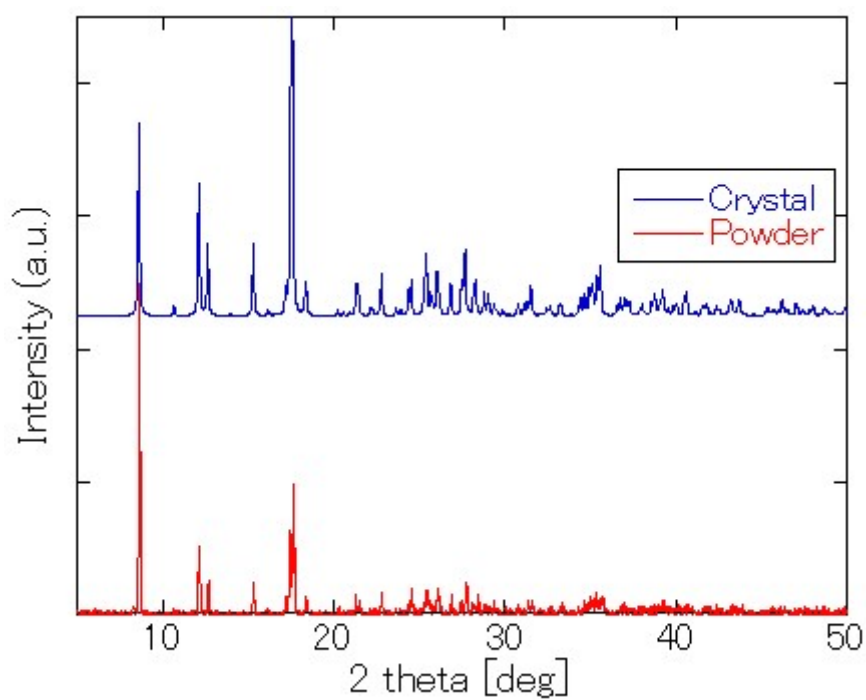

Fig. S11 Powder X-ray diffraction of 2Au-0.25G

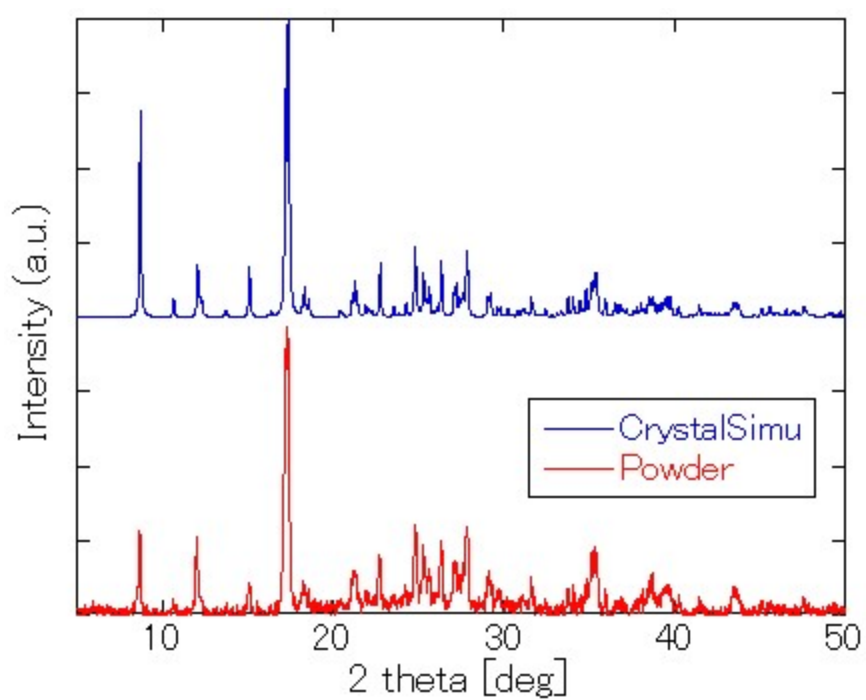

Fig. S12 Powder X-ray diffraction of 2Ag-0.25G

## Remeasurement of magnetic susceptibility

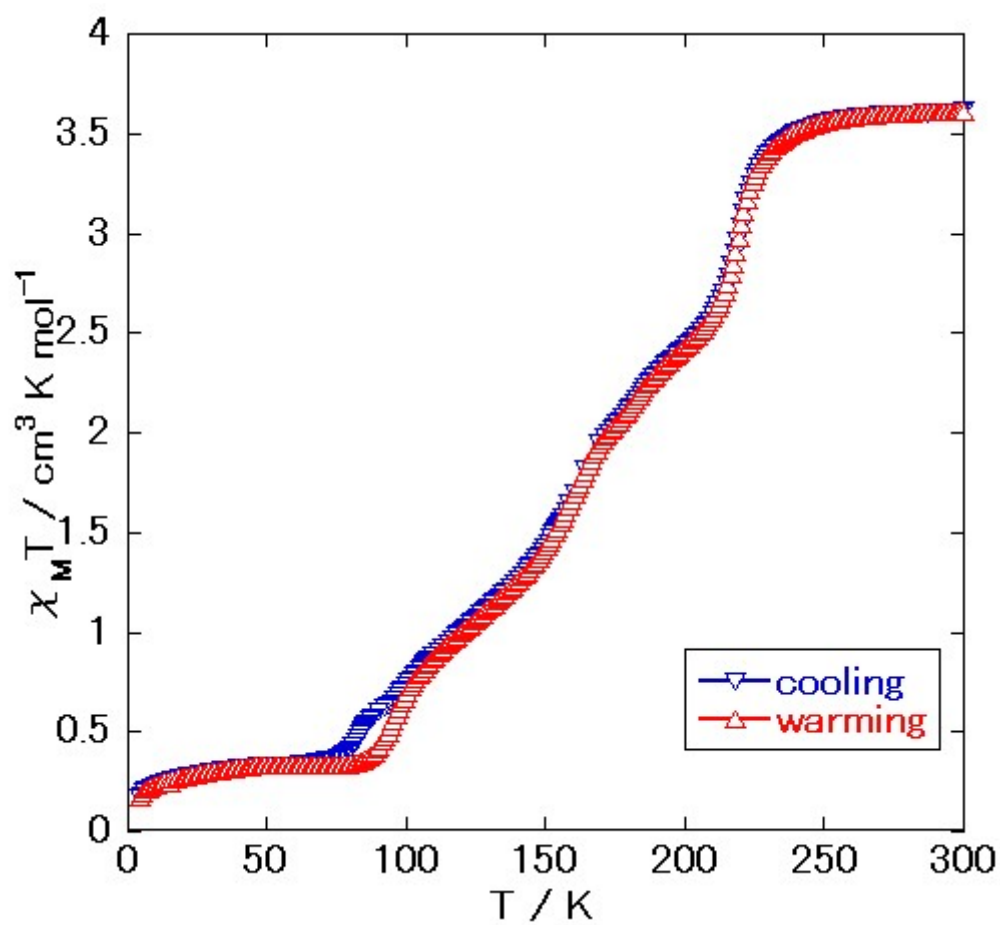

Fig. S13 Remeasurement of magnetic susceptibility of 1Ag·0.25G (Powder)

## Additional crystallographic data

Table S1. Crystal data and structure refinement for 1Au at 296 K

|                                   |                                                                                  |                    |
|-----------------------------------|----------------------------------------------------------------------------------|--------------------|
| Identification code               | test_0_APEX3_a                                                                   |                    |
| Empirical formula                 | C <sub>14</sub> H <sub>12</sub> Au <sub>2</sub> Fe N <sub>8</sub> O <sub>2</sub> |                    |
| Formula weight                    | 774.10                                                                           |                    |
| Temperature                       | 296(2) K                                                                         |                    |
| Wavelength                        | 0.71073 Å                                                                        |                    |
| Crystal system                    | Monoclinic                                                                       |                    |
| Space group                       | P2 <sub>1</sub> /n                                                               |                    |
| Unit cell dimensions              | a = 7.9892(5) Å                                                                  | α = 90°.           |
|                                   | b = 15.5225(9) Å                                                                 | β = 111.4960(10)°. |
|                                   | c = 8.7466(5) Å                                                                  | γ = 90°.           |
| Volume                            | 1009.24(10) Å <sup>3</sup>                                                       |                    |
| Z                                 | 2                                                                                |                    |
| Density (calculated)              | 2.547 Mg/m <sup>3</sup>                                                          |                    |
| Absorption coefficient            | 15.235 mm <sup>-1</sup>                                                          |                    |
| F(000)                            | 704                                                                              |                    |
| Crystal size                      | 0.407 x 0.210 x 0.142 mm <sup>3</sup>                                            |                    |
| Theta range for data collection   | 2.624 to 31.376°.                                                                |                    |
| Index ranges                      | -8 ≤ h ≤ 11, -19 ≤ k ≤ 22, -11 ≤ l ≤ 12                                          |                    |
| Reflections collected             | 7753                                                                             |                    |
| Independent reflections           | 3051 [R(int) = 0.0252]                                                           |                    |
| Completeness to theta = 25.000°   | 99.9 %                                                                           |                    |
| Absorption correction             | Semi-empirical from equivalent                                                   |                    |
| Max. and min. transmission        | 0.22 and 0.15                                                                    |                    |
| Refinement method                 | Full-matrix least-squares on F <sup>2</sup>                                      |                    |
| Data / restraints / parameters    | 3051 / 0 / 125                                                                   |                    |
| Goodness-of-fit on F <sup>2</sup> | 1.063                                                                            |                    |
| Final R indices [I > 2σ(I)]       | R1 = 0.0263, wR2 = 0.0586                                                        |                    |
| R indices (all data)              | R1 = 0.0372, wR2 = 0.0621                                                        |                    |
| Extinction coefficient            | n/a                                                                              |                    |
| Largest diff. peak and hole       | 0.925 and -1.935 e.Å <sup>-3</sup>                                               |                    |



Table S2. Crystal data and structure refinement for 1Au at 100 K

|                                   |                                             |                    |
|-----------------------------------|---------------------------------------------|--------------------|
| Identification code               | test_0_APEX3_a                              |                    |
| Empirical formula                 | C14 H12 Au2 Fe N8 O2                        |                    |
| Formula weight                    | 774.10                                      |                    |
| Temperature                       | 100(2) K                                    |                    |
| Wavelength                        | 0.71073 Å                                   |                    |
| Crystal system                    | Monoclinic                                  |                    |
| Space group                       | P2 <sub>1</sub> /n                          |                    |
| Unit cell dimensions              | a = 7.9046(8) Å                             | α = 90°.           |
|                                   | b = 15.6559(15) Å                           | β = 112.5380(10)°. |
|                                   | c = 8.5964(8) Å                             | γ = 90°.           |
| Volume                            | 982.59(16) Å <sup>3</sup>                   |                    |
| Z                                 | 2                                           |                    |
| Density (calculated)              | 2.616 Mg/m <sup>3</sup>                     |                    |
| Absorption coefficient            | 15.649 mm <sup>-1</sup>                     |                    |
| F(000)                            | 704                                         |                    |
| Crystal size                      | 0.407 x 0.210 x 0.142 mm <sup>3</sup>       |                    |
| Theta range for data collection   | 2.602 to 31.276°.                           |                    |
| Index ranges                      | -11 ≤ h ≤ 8, -20 ≤ k ≤ 22, -12 ≤ l ≤ 11     |                    |
| Reflections collected             | 7372                                        |                    |
| Independent reflections           | 2971 [R(int) = 0.0201]                      |                    |
| Completeness to theta = 25.000°   | 99.9 %                                      |                    |
| Absorption correction             | Semi-empirical from equivalents             |                    |
| Max. and min. transmission        | 0.21 and 0.15                               |                    |
| Refinement method                 | Full-matrix least-squares on F <sup>2</sup> |                    |
| Data / restraints / parameters    | 2971 / 0 / 125                              |                    |
| Goodness-of-fit on F <sup>2</sup> | 1.048                                       |                    |
| Final R indices [I > 2σ(I)]       | R1 = 0.0194, wR2 = 0.0406                   |                    |
| R indices (all data)              | R1 = 0.0238, wR2 = 0.0420                   |                    |
| Extinction coefficient            | n/a                                         |                    |
| Largest diff. peak and hole       | 1.093 and -1.092 e.Å <sup>-3</sup>          |                    |

Table S3. Crystal data and structure refinement for 1Ag at 298 K

|                                   |                                                                                  |                    |
|-----------------------------------|----------------------------------------------------------------------------------|--------------------|
| Identification code               | test_0_APEX3_a                                                                   |                    |
| Empirical formula                 | C <sub>14</sub> H <sub>12</sub> Ag <sub>2</sub> Fe N <sub>8</sub> O <sub>2</sub> |                    |
| Formula weight                    | 595.91                                                                           |                    |
| Temperature                       | 298(2) K                                                                         |                    |
| Wavelength                        | 0.71073 Å                                                                        |                    |
| Crystal system                    | Monoclinic                                                                       |                    |
| Space group                       | P2 <sub>1</sub> /n                                                               |                    |
| Unit cell dimensions              | a = 7.8105(4) Å                                                                  | α = 90°.           |
|                                   | b = 16.1809(8) Å                                                                 | β = 110.5400(10)°. |
|                                   | c = 8.4579(4) Å                                                                  | γ = 90°.           |
| Volume                            | 1000.96(9) Å <sup>3</sup>                                                        |                    |
| Z                                 | 2                                                                                |                    |
| Density (calculated)              | 1.977 Mg/m <sup>3</sup>                                                          |                    |
| Absorption coefficient            | 2.677 mm <sup>-1</sup>                                                           |                    |
| F(000)                            | 576                                                                              |                    |
| Crystal size                      | 0.300 x 0.270 x 0.200 mm <sup>3</sup>                                            |                    |
| Theta range for data collection   | 2.517 to 27.511°.                                                                |                    |
| Index ranges                      | -9 ≤ h ≤ 10, -21 ≤ k ≤ 13, -10 ≤ l ≤ 9                                           |                    |
| Reflections collected             | 6225                                                                             |                    |
| Independent reflections           | 2294 [R(int) = 0.0216]                                                           |                    |
| Completeness to theta = 25.000°   | 100.0 %                                                                          |                    |
| Absorption correction             | Semi-empirical from equivalents                                                  |                    |
| Max. and min. transmission        | 0.62 and 0.48                                                                    |                    |
| Refinement method                 | Full-matrix least-squares on F <sup>2</sup>                                      |                    |
| Data / restraints / parameters    | 2294 / 0 / 126                                                                   |                    |
| Goodness-of-fit on F <sup>2</sup> | 1.064                                                                            |                    |
| Final R indices [I > 2σ(I)]       | R1 = 0.0230, wR2 = 0.0560                                                        |                    |
| R indices (all data)              | R1 = 0.0260, wR2 = 0.0575                                                        |                    |
| Extinction coefficient            | 0.0192(8)                                                                        |                    |
| Largest diff. peak and hole       | 0.950 and -0.903 e.Å <sup>-3</sup>                                               |                    |

Table S4. Crystal data and structure refinement for 1Ag at 90 K

|                                   |                                                                                  |                    |
|-----------------------------------|----------------------------------------------------------------------------------|--------------------|
| Identification code               | test_0_APEX3_a                                                                   |                    |
| Empirical formula                 | C <sub>14</sub> H <sub>12</sub> Ag <sub>2</sub> Fe N <sub>8</sub> O <sub>2</sub> |                    |
| Formula weight                    | 595.91                                                                           |                    |
| Temperature                       | 90(2) K                                                                          |                    |
| Wavelength                        | 0.71073 Å                                                                        |                    |
| Crystal system                    | Monoclinic                                                                       |                    |
| Space group                       | P2 <sub>1</sub> /n                                                               |                    |
| Unit cell dimensions              | a = 7.6006(3) Å                                                                  | α = 90°.           |
|                                   | b = 16.5407(7) Å                                                                 | β = 110.2280(10)°. |
|                                   | c = 8.1805(3) Å                                                                  | γ = 90°.           |
| Volume                            | 965.02(7) Å <sup>3</sup>                                                         |                    |
| Z                                 | 2                                                                                |                    |
| Density (calculated)              | 2.051 Mg/m <sup>3</sup>                                                          |                    |
| Absorption coefficient            | 2.777 mm <sup>-1</sup>                                                           |                    |
| F(000)                            | 576                                                                              |                    |
| Crystal size                      | 0.300 x 0.270 x 0.200 mm <sup>3</sup>                                            |                    |
| Theta range for data collection   | 2.463 to 27.527°.                                                                |                    |
| Index ranges                      | -9<=h<=6, -21<=k<=21, -6<=l<=10                                                  |                    |
| Reflections collected             | 5998                                                                             |                    |
| Independent reflections           | 2223 [R(int) = 0.0129]                                                           |                    |
| Completeness to theta = 25.000°   | 100.0 %                                                                          |                    |
| Absorption correction             | Semi-empirical from equivalents                                                  |                    |
| Max. and min. transmission        | 0.61 and 0.50                                                                    |                    |
| Refinement method                 | Full-matrix least-squares on F <sup>2</sup>                                      |                    |
| Data / restraints / parameters    | 2223 / 0 / 125                                                                   |                    |
| Goodness-of-fit on F <sup>2</sup> | 1.155                                                                            |                    |
| Final R indices [I>2sigma(I)]     | R1 = 0.0158, wR2 = 0.0391                                                        |                    |
| R indices (all data)              | R1 = 0.0164, wR2 = 0.0394                                                        |                    |
| Extinction coefficient            | n/a                                                                              |                    |
| Largest diff. peak and hole       | 0.372 and -0.604 e.Å <sup>-3</sup>                                               |                    |

Table S5. Crystal data and structure refinement for 1Ag-0.25G at 296 K

|                                   |                                             |                  |
|-----------------------------------|---------------------------------------------|------------------|
| Identification code               | test_1_a                                    |                  |
| Empirical formula                 | C61 H54 Ag8 Fe4 N34 O9                      |                  |
| Formula weight                    | 2493.74                                     |                  |
| Temperature                       | 296(2) K                                    |                  |
| Wavelength                        | 0.71073 Å                                   |                  |
| Crystal system                    | Monoclinic                                  |                  |
| Space group                       | P2 <sub>1</sub> /c                          |                  |
| Unit cell dimensions              | a = 15.7353(17) Å                           | α = 90°.         |
|                                   | b = 28.498(3) Å                             | β = 110.685(2)°. |
|                                   | c = 21.353(2) Å                             | γ = 90°.         |
| Volume                            | 8957.8(17) Å <sup>3</sup>                   |                  |
| Z                                 | 4                                           |                  |
| Density (calculated)              | 1.849 Mg/m <sup>3</sup>                     |                  |
| Absorption coefficient            | 2.399 mm <sup>-1</sup>                      |                  |
| F(000)                            | 4840                                        |                  |
| Crystal size                      | 0.400 x 0.290 x 0.280 mm <sup>3</sup>       |                  |
| Theta range for data collection   | 1.245 to 25.438°.                           |                  |
| Index ranges                      | -19 ≤ h ≤ 17, 0 ≤ k ≤ 34, 0 ≤ l ≤ 25        |                  |
| Reflections collected             | 16355                                       |                  |
| Independent reflections           | 16355 [R(int) = ?]                          |                  |
| Completeness to theta = 25.242°   | 99.9 %                                      |                  |
| Absorption correction             | Semi-empirical from equivalents             |                  |
| Max. and min. transmission        | 0.55 and 0.39                               |                  |
| Refinement method                 | Full-matrix least-squares on F <sup>2</sup> |                  |
| Data / restraints / parameters    | 16355 / 0 / 1058                            |                  |
| Goodness-of-fit on F <sup>2</sup> | 0.998                                       |                  |
| Final R indices [I > 2σ(I)]       | R1 = 0.0491, wR2 = 0.1320                   |                  |
| R indices (all data)              | R1 = 0.0966, wR2 = 0.1667                   |                  |
| Extinction coefficient            | n/a                                         |                  |
| Largest diff. peak and hole       | 0.782 and -0.819 e.Å <sup>-3</sup>          |                  |

Table S6. Crystal data and structure refinement for 1Ag-0.25G at 190 K.

|                                   |                                             |                  |
|-----------------------------------|---------------------------------------------|------------------|
| Identification code               | test_1_a                                    |                  |
| Empirical formula                 | C61 H54 Ag8 Fe4 N34 O9                      |                  |
| Formula weight                    | 2493.74                                     |                  |
| Temperature                       | 190(2) K                                    |                  |
| Wavelength                        | 0.71073 Å                                   |                  |
| Crystal system                    | Monoclinic                                  |                  |
| Space group                       | P2 <sub>1</sub> /c                          |                  |
| Unit cell dimensions              | a = 15.588(3) Å                             | α = 90°.         |
|                                   | b = 28.221(5) Å                             | β = 111.301(3)°. |
|                                   | c = 21.120(4) Å                             | γ = 90°.         |
| Volume                            | 8656(3) Å <sup>3</sup>                      |                  |
| Z                                 | 4                                           |                  |
| Density (calculated)              | 1.914 Mg/m <sup>3</sup>                     |                  |
| Absorption coefficient            | 2.483 mm <sup>-1</sup>                      |                  |
| F(000)                            | 4840                                        |                  |
| Crystal size                      | 0.400 x 0.290 x 0.280 mm <sup>3</sup>       |                  |
| Theta range for data collection   | 1.262 to 30.822°.                           |                  |
| Index ranges                      | -22 ≤ h ≤ 22, 0 ≤ k ≤ 39, -30 ≤ l ≤ 29      |                  |
| Reflections collected             | 34874                                       |                  |
| Independent reflections           | 34874 [R(int) = ?]                          |                  |
| Completeness to theta = 25.242°   | 98.5 %                                      |                  |
| Absorption correction             | Semi-empirical from equivalents             |                  |
| Max. and min. transmission        | 0.54 and 0.40                               |                  |
| Refinement method                 | Full-matrix least-squares on F <sup>2</sup> |                  |
| Data / restraints / parameters    | 34874 / 0 / 1058                            |                  |
| Goodness-of-fit on F <sup>2</sup> | 1.021                                       |                  |
| Final R indices [I > 2σ(I)]       | R1 = 0.0602, wR2 = 0.1513                   |                  |
| R indices (all data)              | R1 = 0.1113, wR2 = 0.1856                   |                  |
| Extinction coefficient            | n/a                                         |                  |
| Largest diff. peak and hole       | 1.545 and -1.506 e.Å <sup>-3</sup>          |                  |

Table S7. Crystal data and structure refinement for 1Ag-0.25G at 130 K

|                                   |                                             |                  |
|-----------------------------------|---------------------------------------------|------------------|
| Identification code               | test_1_a                                    |                  |
| Empirical formula                 | C61 H54 Ag8 Fe4 N34 O9                      |                  |
| Formula weight                    | 2493.74                                     |                  |
| Temperature                       | 130(2) K                                    |                  |
| Wavelength                        | 0.71073 Å                                   |                  |
| Crystal system                    | Monoclinic                                  |                  |
| Space group                       | P2 <sub>1</sub> /c                          |                  |
| Unit cell dimensions              | a = 15.575(5) Å                             | α = 90°.         |
|                                   | b = 27.881(9) Å                             | β = 112.615(5)°. |
|                                   | c = 21.080(9) Å                             | γ = 90°.         |
| Volume                            | 8450(5) Å <sup>3</sup>                      |                  |
| Z                                 | 4                                           |                  |
| Density (calculated)              | 1.960 Mg/m <sup>3</sup>                     |                  |
| Absorption coefficient            | 2.544 mm <sup>-1</sup>                      |                  |
| F(000)                            | 4840                                        |                  |
| Crystal size                      | 0.400 x 0.290 x 0.280 mm <sup>3</sup>       |                  |
| Theta range for data collection   | 1.276 to 31.099°.                           |                  |
| Index ranges                      | -19 ≤ h ≤ 21, -38 ≤ k ≤ 0, -19 ≤ l ≤ 28     |                  |
| Reflections collected             | 20006                                       |                  |
| Independent reflections           | 20006 [R(int) = ?]                          |                  |
| Completeness to theta = 25.000°   | 96.6 %                                      |                  |
| Absorption correction             | Semi-empirical from equivalents             |                  |
| Max. and min. transmission        | 0.54 and 0.36                               |                  |
| Refinement method                 | Full-matrix least-squares on F <sup>2</sup> |                  |
| Data / restraints / parameters    | 20006 / 21 / 1059                           |                  |
| Goodness-of-fit on F <sup>2</sup> | 1.134                                       |                  |
| Final R indices [I > 2σ(I)]       | R1 = 0.0629, wR2 = 0.1609                   |                  |
| R indices (all data)              | R1 = 0.0972, wR2 = 0.1905                   |                  |
| Extinction coefficient            | n/a                                         |                  |
| Largest diff. peak and hole       | 2.545 and -1.845 e.Å <sup>-3</sup>          |                  |

Table S8. Crystal data and structure refinement for 1Ag·0.25G at 87 K

|                                   |                                             |                  |
|-----------------------------------|---------------------------------------------|------------------|
| Identification code               | test_1_a                                    |                  |
| Empirical formula                 | C61 H54 Ag8 Fe4 N34 O9                      |                  |
| Formula weight                    | 2493.74                                     |                  |
| Temperature                       | 87(2) K                                     |                  |
| Wavelength                        | 0.71073 Å                                   |                  |
| Crystal system                    | Monoclinic                                  |                  |
| Space group                       | P2 <sub>1</sub> /c                          |                  |
| Unit cell dimensions              | a = 15.4985(18) Å                           | α = 90°.         |
|                                   | b = 27.743(3) Å                             | β = 112.563(2)°. |
|                                   | c = 20.928(3) Å                             | γ = 90°.         |
| Volume                            | 8310.0(18) Å <sup>3</sup>                   |                  |
| Z                                 | 4                                           |                  |
| Density (calculated)              | 1.993 Mg/m <sup>3</sup>                     |                  |
| Absorption coefficient            | 2.586 mm <sup>-1</sup>                      |                  |
| F(000)                            | 4840                                        |                  |
| Crystal size                      | 0.400 x 0.290 x 0.280 mm <sup>3</sup>       |                  |
| Theta range for data collection   | 1.284 to 28.992°.                           |                  |
| Index ranges                      | -19 ≤ h ≤ 21, -37 ≤ k ≤ 0, -18 ≤ l ≤ 28     |                  |
| Reflections collected             | 20724                                       |                  |
| Independent reflections           | 20724 [R(int) = ?]                          |                  |
| Completeness to theta = 25.242°   | 99.4 %                                      |                  |
| Absorption correction             | Semi-empirical from equivalents             |                  |
| Max. and min. transmission        | 0.53 and 0.28                               |                  |
| Refinement method                 | Full-matrix least-squares on F <sup>2</sup> |                  |
| Data / restraints / parameters    | 20724 / 12 / 1058                           |                  |
| Goodness-of-fit on F <sup>2</sup> | 1.098                                       |                  |
| Final R indices [I > 2σ(I)]       | R1 = 0.0564, wR2 = 0.1456                   |                  |
| R indices (all data)              | R1 = 0.0994, wR2 = 0.1792                   |                  |
| Extinction coefficient            | n/a                                         |                  |
| Largest diff. peak and hole       | 2.305 and -2.891 e.Å <sup>-3</sup>          |                  |

Table S9. Crystal data and structure refinement for 2Au-0.25G at 296 K

|                                   |                                             |                             |
|-----------------------------------|---------------------------------------------|-----------------------------|
| Identification code               | test_1_a                                    |                             |
| Empirical formula                 | C31 H28 Au4 Fe2 N17 O5                      |                             |
| Formula weight                    | 1618.27                                     |                             |
| Temperature                       | 296(2) K                                    |                             |
| Wavelength                        | 0.71073 Å                                   |                             |
| Crystal system                    | Monoclinic                                  |                             |
| Space group                       | C2/c                                        |                             |
| Unit cell dimensions              | a = 29.201(4) Å                             | $\alpha = 90^\circ$ .       |
|                                   | b = 10.9601(14) Å                           | $\beta = 90.275(2)^\circ$ . |
|                                   | c = 14.0059(17) Å                           | $\gamma = 90^\circ$ .       |
| Volume                            | 4482.4(10) Å <sup>3</sup>                   |                             |
| Z                                 | 4                                           |                             |
| Density (calculated)              | 2.398 Mg/m <sup>3</sup>                     |                             |
| Absorption coefficient            | 13.729 mm <sup>-1</sup>                     |                             |
| F(000)                            | 2964                                        |                             |
| Crystal size                      | 0.230 x 0.200 x 0.180 mm <sup>3</sup>       |                             |
| Theta range for data collection   | 1.395 to 30.298°.                           |                             |
| Index ranges                      | -41 ≤ h ≤ 41, 0 ≤ k ≤ 15, 0 ≤ l ≤ 19        |                             |
| Reflections collected             | 6408                                        |                             |
| Independent reflections           | 6408 [R(int) = ?]                           |                             |
| Completeness to theta = 25.242°   | 100.0 %                                     |                             |
| Absorption correction             | Semi-empirical from equivalents             |                             |
| Max. and min. transmission        | 0.746011 and 0.468132                       |                             |
| Refinement method                 | Full-matrix least-squares on F <sup>2</sup> |                             |
| Data / restraints / parameters    | 6408 / 22 / 368                             |                             |
| Goodness-of-fit on F <sup>2</sup> | 0.873                                       |                             |
| Final R indices [I > 2σ(I)]       | R1 = 0.0460, wR2 = 0.1218                   |                             |
| R indices (all data)              | R1 = 0.0649, wR2 = 0.1337                   |                             |
| Extinction coefficient            | n/a                                         |                             |
| Largest diff. peak and hole       | 2.361 and -2.380 e.Å <sup>-3</sup>          |                             |



Table S10. Crystal data and structure refinement for 2Au·0.25G at 90 K

|                                   |                                             |                             |
|-----------------------------------|---------------------------------------------|-----------------------------|
| Identification code               | test_1_a                                    |                             |
| Empirical formula                 | C31 H28 Au4 Fe2 N17 O5                      |                             |
| Formula weight                    | 1618.27                                     |                             |
| Temperature                       | 90(2) K                                     |                             |
| Wavelength                        | 0.71073 Å                                   |                             |
| Crystal system                    | Monoclinic                                  |                             |
| Space group                       | C2/c                                        |                             |
| Unit cell dimensions              | a = 28.654(7) Å                             | $\alpha = 90^\circ$ .       |
|                                   | b = 10.772(3) Å                             | $\beta = 90.172(4)^\circ$ . |
|                                   | c = 13.756(3) Å                             | $\gamma = 90^\circ$ .       |
| Volume                            | 4246.1(17) Å <sup>3</sup>                   |                             |
| Z                                 | 4                                           |                             |
| Density (calculated)              | 2.531 Mg/m <sup>3</sup>                     |                             |
| Absorption coefficient            | 14.493 mm <sup>-1</sup>                     |                             |
| F(000)                            | 2964                                        |                             |
| Crystal size                      | 0.230 x 0.200 x 0.180 mm <sup>3</sup>       |                             |
| Theta range for data collection   | 1.421 to 28.203°.                           |                             |
| Index ranges                      | -37<=h<=15, -14<=k<=13, -18<=l<=17          |                             |
| Reflections collected             | 13759                                       |                             |
| Independent reflections           | 5162 [R(int) = 0.0426]                      |                             |
| Completeness to theta = 25.242°   | 100.0 %                                     |                             |
| Absorption correction             | Numerical Mu From Formula                   |                             |
| Max. and min. transmission        | 0.18 and 0.09                               |                             |
| Refinement method                 | Full-matrix least-squares on F <sup>2</sup> |                             |
| Data / restraints / parameters    | 5162 / 12 / 321                             |                             |
| Goodness-of-fit on F <sup>2</sup> | 1.154                                       |                             |
| Final R indices [I>2sigma(I)]     | R1 = 0.0467, wR2 = 0.1370                   |                             |
| R indices (all data)              | R1 = 0.0477, wR2 = 0.1380                   |                             |
| Extinction coefficient            | n/a                                         |                             |
| Largest diff. peak and hole       | 6.074 and -4.791 e.Å <sup>-3</sup>          |                             |

Table S11. Crystal data and structure refinement for 2Ag<sub>2</sub>O·0.25G at 296 K

|                                   |                                                                                                |                 |
|-----------------------------------|------------------------------------------------------------------------------------------------|-----------------|
| Identification code               | test_1_a                                                                                       |                 |
| Empirical formula                 | C <sub>31</sub> H <sub>28</sub> Ag <sub>4</sub> Fe <sub>2</sub> N <sub>17</sub> O <sub>5</sub> |                 |
| Formula weight                    | 1261.88                                                                                        |                 |
| Temperature                       | 296(2) K                                                                                       |                 |
| Wavelength                        | 0.71073 Å                                                                                      |                 |
| Crystal system                    | Monoclinic                                                                                     |                 |
| Space group                       | C2/c                                                                                           |                 |
| Unit cell dimensions              | a = 29.288(6) Å                                                                                | α = 90°.        |
|                                   | b = 10.788(2) Å                                                                                | β = 90.039(4)°. |
|                                   | c = 14.325(3) Å                                                                                | γ = 90°.        |
| Volume                            | 4526.1(17) Å <sup>3</sup>                                                                      |                 |
| Z                                 | 4                                                                                              |                 |
| Density (calculated)              | 1.852 Mg/m <sup>3</sup>                                                                        |                 |
| Absorption coefficient            | 2.376 mm <sup>-1</sup>                                                                         |                 |
| F(000)                            | 2452                                                                                           |                 |
| Crystal size                      | 0.218 x 0.204 x 0.088 mm <sup>3</sup>                                                          |                 |
| Theta range for data collection   | 1.391 to 28.422°.                                                                              |                 |
| Index ranges                      | -37 ≤ h ≤ 39, -14 ≤ k ≤ 11, -18 ≤ l ≤ 19                                                       |                 |
| Reflections collected             | 15585                                                                                          |                 |
| Independent reflections           | 5665 [R(int) = 0.0363]                                                                         |                 |
| Completeness to theta = 25.242°   | 100.0 %                                                                                        |                 |
| Absorption correction             | Numerical Mu From Formula                                                                      |                 |
| Max. and min. transmission        | 0.82 and 0.62                                                                                  |                 |
| Refinement method                 | Full-matrix least-squares on F <sup>2</sup>                                                    |                 |
| Data / restraints / parameters    | 5665 / 26 / 347                                                                                |                 |
| Goodness-of-fit on F <sup>2</sup> | 0.836                                                                                          |                 |
| Final R indices [I > 2σ(I)]       | R1 = 0.0410, wR2 = 0.1140                                                                      |                 |
| R indices (all data)              | R1 = 0.0617, wR2 = 0.1314                                                                      |                 |
| Extinction coefficient            | n/a                                                                                            |                 |
| Largest diff. peak and hole       | 0.818 and -0.921 e.Å <sup>-3</sup>                                                             |                 |

Table S12. Crystal data and structure refinement for 2Ag·0.25G at 150 K

|                                   |                                             |                             |
|-----------------------------------|---------------------------------------------|-----------------------------|
| Identification code               | test_1_a                                    |                             |
| Empirical formula                 | C31 H28 Ag4 Fe2 N17 O5                      |                             |
| Formula weight                    | 1261.88                                     |                             |
| Temperature                       | 150(2) K                                    |                             |
| Wavelength                        | 0.71073 Å                                   |                             |
| Crystal system                    | Monoclinic                                  |                             |
| Space group                       | C2/c                                        |                             |
| Unit cell dimensions              | a = 28.896(6) Å                             | $\alpha = 90^\circ$ .       |
|                                   | b = 10.623(3) Å                             | $\beta = 90.033(4)^\circ$ . |
|                                   | c = 14.044(3) Å                             | $\gamma = 90^\circ$ .       |
| Volume                            | 4310.9(17) Å <sup>3</sup>                   |                             |
| Z                                 | 4                                           |                             |
| Density (calculated)              | 1.944 Mg/m <sup>3</sup>                     |                             |
| Absorption coefficient            | 2.495 mm <sup>-1</sup>                      |                             |
| F(000)                            | 2452                                        |                             |
| Crystal size                      | 0.218 x 0.204 x 0.088 mm <sup>3</sup>       |                             |
| Theta range for data collection   | 1.409 to 28.785°.                           |                             |
| Index ranges                      | -38 ≤ h ≤ 37, -14 ≤ k ≤ 13, -18 ≤ l ≤ 11    |                             |
| Reflections collected             | 15149                                       |                             |
| Independent reflections           | 5581 [R(int) = 0.0374]                      |                             |
| Completeness to theta = 25.242°   | 99.9 %                                      |                             |
| Absorption correction             | Numerical Mu From Formula                   |                             |
| Max. and min. transmission        | 0.81 and 0.62                               |                             |
| Refinement method                 | Full-matrix least-squares on F <sup>2</sup> |                             |
| Data / restraints / parameters    | 5581 / 9 / 305                              |                             |
| Goodness-of-fit on F <sup>2</sup> | 0.817                                       |                             |
| Final R indices [I > 2σ(I)]       | R1 = 0.0363, wR2 = 0.1008                   |                             |
| R indices (all data)              | R1 = 0.0449, wR2 = 0.1138                   |                             |
| Extinction coefficient            | n/a                                         |                             |
| Largest diff. peak and hole       | 0.661 and -1.453 e.Å <sup>-3</sup>          |                             |

Table S13. Crystal data and structure refinement for 2Ag<sub>4</sub>0.25G at 90 K

|                                   |                                                                                                |                 |
|-----------------------------------|------------------------------------------------------------------------------------------------|-----------------|
| Identification code               | test_1_a                                                                                       |                 |
| Empirical formula                 | C <sub>33</sub> H <sub>30</sub> Ag <sub>4</sub> Fe <sub>2</sub> N <sub>18</sub> O <sub>5</sub> |                 |
| Formula weight                    | 1301.93                                                                                        |                 |
| Temperature                       | 90(2) K                                                                                        |                 |
| Wavelength                        | 0.71073 Å                                                                                      |                 |
| Crystal system                    | Monoclinic                                                                                     |                 |
| Space group                       | C2/c                                                                                           |                 |
| Unit cell dimensions              | a = 28.882(5) Å                                                                                | α = 90°.        |
|                                   | b = 10.5619(19) Å                                                                              | β = 90.020(3)°. |
|                                   | c = 13.999(3) Å                                                                                | γ = 90°.        |
| Volume                            | 4270.6(13) Å <sup>3</sup>                                                                      |                 |
| Z                                 | 4                                                                                              |                 |
| Density (calculated)              | 2.025 Mg/m <sup>3</sup>                                                                        |                 |
| Absorption coefficient            | 2.523 mm <sup>-1</sup>                                                                         |                 |
| F(000)                            | 2536                                                                                           |                 |
| Crystal size                      | 0.218 x 0.204 x 0.084 mm <sup>3</sup>                                                          |                 |
| Theta range for data collection   | 1.410 to 29.713°.                                                                              |                 |
| Index ranges                      | -17 ≤ h ≤ 40, -14 ≤ k ≤ 14, -18 ≤ l ≤ 19                                                       |                 |
| Reflections collected             | 13470                                                                                          |                 |
| Independent reflections           | 5289 [R(int) = 0.0458]                                                                         |                 |
| Completeness to theta = 25.242°   | 99.4 %                                                                                         |                 |
| Absorption correction             | Numerical Mu From Formula                                                                      |                 |
| Max. and min. transmission        | 0.87 and 0.66                                                                                  |                 |
| Refinement method                 | Full-matrix least-squares on F <sup>2</sup>                                                    |                 |
| Data / restraints / parameters    | 5289 / 52 / 305                                                                                |                 |
| Goodness-of-fit on F <sup>2</sup> | 1.665                                                                                          |                 |
| Final R indices [I > 2σ(I)]       | R1 = 0.0643, wR2 = 0.2263                                                                      |                 |
| R indices (all data)              | R1 = 0.0761, wR2 = 0.2357                                                                      |                 |
| Extinction coefficient            | n/a                                                                                            |                 |
| Largest diff. peak and hole       | 2.080 and -2.701 e.Å <sup>-3</sup>                                                             |                 |
